# Supplementary material
Source: PubMed Central journal article supplement (PMC3356424)
Supplement: 11_172_L_Wang.Suppl.pdf [file 11_172_L_Wang.Suppl.pdf]

## Supplemental Data

# Homeobox D10 Gene, a Candidate Tumor Suppressor, Is Downregulated through Promoter Hypermethylation and Associated with Gastric Carcinogenesis

Liangjing Wang,<sup>1,2\*</sup> Shujie Chen,<sup>1\*</sup> Meng Xue,<sup>1</sup> Jing Zhong,<sup>2</sup> Xian Wang,<sup>3</sup> Lihong Gan,<sup>2</sup> Emily KY Lam,<sup>4</sup> Xin Liu,<sup>4</sup> Jianbin Zhang,<sup>4</sup> Tianhua Zhou,<sup>5</sup> Jun Yu,<sup>4</sup> Hongchuan Jin,<sup>4</sup> and Jianmin Si<sup>1</sup>

Online address: <http://www.molmed.org>

The Feinstein Institute  
for Medical Research 

**Supplementary Table 1.** Primer sequences used for quantitative real-time PCR

| Gene          | Primer  | Sequence                     | PCR product (bp) |
|---------------|---------|------------------------------|------------------|
| <i>HCLS1</i>  | Forward | 5' GCCCTTGCTGCCCATAG 3'      | 119              |
|               | Reverse | 5' CAGGCTCTGCTTCGTACACT 3'   |                  |
| <i>ANP32A</i> | Forward | 5' CCTCCCGCAACTCACATA 3'     | 297              |
|               | Reverse | 5' CGCTTCTGACCCCTTCT 3'      |                  |
| <i>PDGFRL</i> | Forward | 5' GTCTGGCTGCTGCTTGGT 3'     | 189              |
|               | Reverse | 5' CTGCGTCTTTGGTGCTGA 3'     |                  |
| <i>IGFBP3</i> | Forward | 5' GGCCATGACTGAGGAAAGGA 3'   | 85               |
|               | Reverse | 5' CCTGACTTTGCCAGACCTTCTT 3' |                  |
| <i>CXCL9</i>  | Forward | 5' GGCATCATCTTGCTGGTT 3'     | 97               |
|               | Reverse | 5' GGTGGATAGTCCCTTGGT 3'     |                  |
| <i>RAC2</i>   | Forward | 5' GATGGTGGACAGCAAGCC 3'     | 121              |
|               | Reverse | 5' GAGGGAGAAGCAGATGAGGAAG 3' |                  |
| <i>KRT5</i>   | Forward | 5' CGATGACCTCCGCAACAC 3'     | 340              |
|               | Reverse | 5' GACTGGTCCAACCTCTCTC 3'    |                  |
| <i>NTS</i>    | Forward | 5' AAGCACATGTTCCCTCTT 3'     | 318              |
|               | Reverse | 5' CATAAGCTGCCGTTTCAGA 3'    |                  |
| <i>PAGE4</i>  | Forward | 5' TCTCCCTTCATTCCTCGC 3'     | 182              |
|               | Reverse | 5' AGTTGGTGGTTCCTCTTGC 3'    |                  |
| <i>KRT18</i>  | Forward | 5' AAGAACCACGAAGAGGAAGTA 3'  | 363              |
|               | Reverse | 5' CATCTGTAGGGCGTAGCG 3'     |                  |
| <i>HoxD10</i> | Forward | 5' AAAGTCTCCCAGGTGGAGAG 3'   | 142              |
|               | Reverse | 5' TGCTGGTTGGTGTATCAGAC 3'   |                  |
| <i>GAPDH</i>  | Forward | 5' GGCTCAGTTTGTGGCAGAATC 3'  | 101              |
|               | Reverse | 5' CATCGCCTTCGAAGTTGCT 3'    |                  |

**HOXD10 IS DOWNREGULATED IN GASTRIC CANCER**

**Supplementary Table 2.** Primers of IGFBP3 used for quantitative real-time PCR in ChIP analysis

| ChIP name | Predicted bind sequence | primer (5'-3')            | PCR size |
|-----------|-------------------------|---------------------------|----------|
| A1        | AATAAAACAA (H1)         | (F) CATTGGGCACTGAACAAG    | 179      |
|           | AATAAAAAGT (H2)         | (R) AGCCTGGACTGACCACT     |          |
| A2        | TCITTTTATT (H3)         | (F) CATAAGAAAATGACGGTGCT  | 133      |
|           |                         | (R) TGGAAAAGATCAATTCGTCC  |          |
| A3        | ATTGCTATT (H4)          | (F) AAGATTAACCTCACCCAAGGC | 107      |
|           |                         | (R) AGGTGGATAGGTGACTTG    |          |
| A4        | CTTTATTATT (H5)         | (F) GCCGACAGGAGTTACAG     | 277      |
|           |                         | (R) TGTTCTTCTGTCTGGGTA    |          |

**Supplementary Table 3.** Clinico-pathologic features of *HoxD10* in gastric cancer and normal stomach

| Characteristics              | Normal group  | Gastric cancer | p value |
|------------------------------|---------------|----------------|---------|
| Gender n (%)                 |               |                | 0.500   |
| Male                         | 18 (48.9)     | 19 (44.4)      |         |
| Female                       | 15 (51.1)     | 14 (55.6)      |         |
| Age (mean ± SD)              | 48.27 ± 10.71 | 53.64 ± 10.80  | 0.497   |
| TNM stage n (%)              |               |                |         |
| I                            |               | 4 (12.1)       |         |
| II                           |               | 6 (18.2)       |         |
| III                          |               | 7 (21.2)       |         |
| IV                           |               | 16 (48.5)      |         |
| Differentiation              |               |                |         |
| Poor (or no differentiation) |               | 22 (66.7)      |         |
| Well or moderate             |               | 11 (33.3)      |         |

**Supplementary Table 4.** Fold change (Log<sub>2</sub>) of selected genes in *HoxD10* transfectants detected by cDNA microarray and qRT-PCR (*HoxD10* versus Vector control)

| Gene Symbol   | Gene description                                                 | cDNA microarray<br>Fold change | qRT-PCR<br>Fold change |
|---------------|------------------------------------------------------------------|--------------------------------|------------------------|
| <i>HCLS1</i>  | hematopoietic cell-specific Lyn substrate 1                      | 2.3493805                      | 2.927825               |
| <i>ANP32A</i> | acidic (leucine-rich) nuclear phosphoprotein 32 family, member A | 1.5278893                      | 0.785913               |
| <i>PDGFRL</i> | platelet-derived growth factor receptor-like                     | 1.4941043                      | 1.724332               |
| <i>IGFBP3</i> | insulin-like growth factor binding protein 3                     | 1.2196761                      | 2.531675               |
| <i>CXCL9</i>  | chemokine (C-X-C motif) ligand 9                                 | 1.1326157                      | 3.626737               |
| <i>RAC2</i>   | ras-related C3 botulinum toxin substrate 2                       | -2.6205406                     | -1.28035               |
| <i>KRT5</i>   | keratin 5                                                        | -1.9828073                     | -2.31552               |
| <i>NTS</i>    | neurotensin                                                      | -1.98145                       | -0.51863               |
| <i>TUSC3</i>  | tumor suppressor candidate 3                                     | -1.290414                      | -0.68204               |

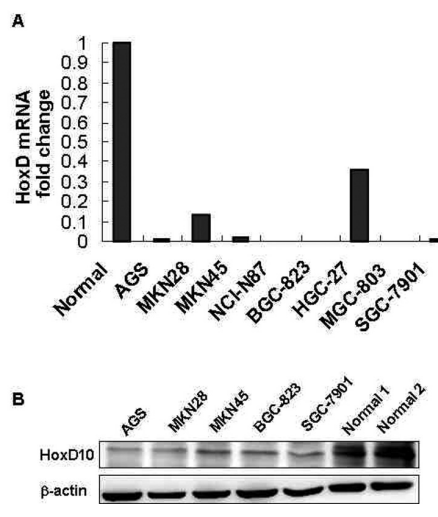

**Supplementary Figure 1.** (A) The relative expression of *HoxD10* mRNA in eight gastric cancer cell lines (AGS, MKN28, MKN45, NCI-N87, BGC823, HGC27, MGC803, and SGC7901) was analyzed by quantitative real-time RT-PCR. The normal stomach tissue is normalized as 1. (B) The expression of *HoxD10* protein in gastric cancer cells were compared to normal stomach tissues. Normal: normal stomach tissue.

**Supplementary Table 5.** Clinico-pathologic features of *HoxD10* methylation in gastric cancer

| Characteristics              | Methylated n (%) | Unmethylated n (%) | p value |
|------------------------------|------------------|--------------------|---------|
| <b>Surgical samples</b>      |                  |                    |         |
| Gender                       |                  |                    | 0.802   |
| Male                         | 24 (48.9)        | 4 (44.4)           |         |
| Female                       | 25 (51.1)        | 5 (55.6)           |         |
| Lauren type                  |                  |                    | 0.631   |
| Intestinal                   | 17 (51.5)        | 2 (40.0)           |         |
| Diffused                     | 16 (48.5)        | 3 (60.0)           |         |
| TNM stage                    |                  |                    | 0.031   |
| I                            | 6 (12.7)         | 5 (55.6)           |         |
| II                           | 8 (17.0)         | 1 (11.1)           |         |
| III                          | 18 (38.3)        | 2 (22.2)           |         |
| IV                           | 15 (31.0)        | 1 (11.1)           |         |
| Differentiation              |                  |                    | 0.042   |
| Poor (or no differentiation) | 15 (56.7)        | 6 (100)            |         |
| Well or moderate             | 6 (43.3)         | 0 (0)              |         |
| <b>Biopsy samples</b>        |                  |                    |         |
| Gender                       |                  |                    | 0.583   |
| Male                         | 14 (58.3)        | 2 (50.0)           |         |
| Female                       | 10 (41.7)        | 2 (50.0)           |         |
| TNM stage                    |                  |                    | 0.534   |
| I                            | 0 (0)            | 0 (0)              |         |
| II                           | 5 (20.8)         | 0 (0)              |         |
| III                          | 7 (29.2)         | 1 (25.0)           |         |
| IV                           | 12 (50.0)        | 3 (75.0)           |         |
| Differentiation              |                  |                    | 0.613   |
| Poor (or no differentiation) | 16 (66.7)        | 3 (75.0)           |         |
| Well or moderate             | 8 (33.3)         | 1 (25.0)           |         |

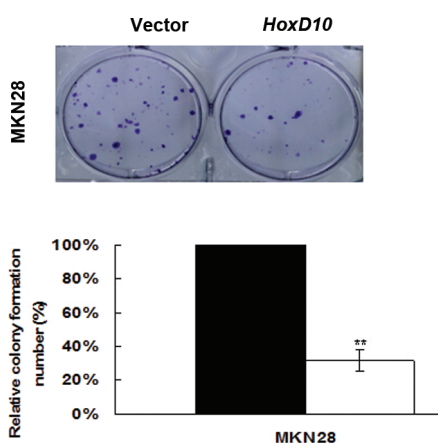

**Supplementary Figure 2.** The surviving monolayer colonies were stained in MKN28 cells after selected with G418. The numbers of colonies in *HoxD10*-transfected cells were presented as mean percentage  $\pm$ SD in low bar diagram, pcDNA3.1 vector transfectants normalized as 100%. ■, Vector; □, *HoxD10*.

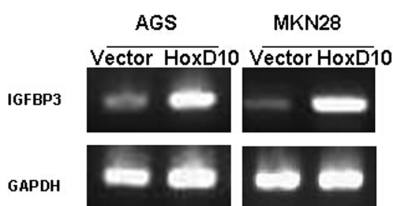

**Supplementary Figure 3.** The expression of IGFBP3 mRNA was detected after transfection with *HoxD10* or control vector in gastric cancer cell lines (AGS and MKN28) by conventional RT-PCR. GAPDH was used as the internal control.
